# Supplementary material for: HMGB1 promotes the development of castration-resistant prostate cancer by regulating androgen receptor activation
Source: PubMed Central journal article supplement — Oncol Rep. 2022 Sep 19;48(5):197. doi: 10.3892/or.2022.8412 (PMC9535630; doi:10.3892/or.2022.8412), 2022-09-19

Figure S1. AR and HMGB1 protein expression levels in LNCaP, C4-2, 22RV1, VCaP, LNCaP95, PC3, and DU145 cells were detected by western blotting. \*P<0.05. AR, androgen receptor; HMGB1, high-mobility group protein B1.

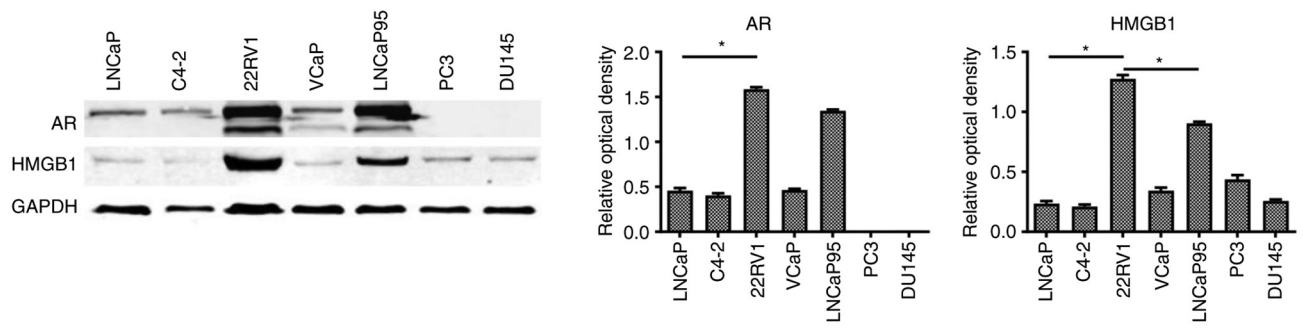

Supplement: Supplementary_Data.pdf [file Supplementary_Data.pdf]
